# Supplementary material for: Design and synthesis of N-methylene-C linked tetrazole and nitramino-1,2,4-triazole: an approach to promising energetic materials
Source: Royal Society of Chemistry journal article supplement (doi:10.1039/c6ta05057c), 2016-01-01

## Electronic Supporting Information

### Design and synthesis of N-methylene-C linked tetrazole and nitramino-1,2,4-triazole: an approach to promising energetic materials

Yongxing Tang,<sup>[a]</sup> Chunlin He,<sup>[a]</sup> Gregory H. Imler,<sup>[b]</sup> Damon A. Parrish<sup>[b]</sup> and  
Jean'ne M. Shreeve\*<sup>[a]</sup>

[a] Dr. Y. Tang, Dr. C. He, Dr. J. M. Shreeve  
Department of Chemistry  
University of Idaho  
Moscow, Idaho, 83844-2343 USA.  
Fax: (+1) 208-885-9146  
E-mail: [jshreeve@uidaho.edu](mailto:jshreeve@uidaho.edu)

[b] Dr. G. H. Imler, Dr. D. A. Parrish  
Naval Research Laboratory  
4555 Overlook Avenue  
Washington, D.C. 20375 USA

## Table of Contents

|                           | Page |
|---------------------------|------|
| 1 Crystal Structure Data  | S3   |
| 2 Theoretical Calculation | S8   |
| 3 NMR Spectra             | S10  |
| 4 DSC plots               | S20  |

## 1 Crystal Structure Data

**Table S1.** Crystal data and structure refinement for **4**.

| Identification code               | <b>4</b>                                                     |                               |
|-----------------------------------|--------------------------------------------------------------|-------------------------------|
| CCDC number                       | 1480143                                                      |                               |
| Empirical formula                 | C <sub>4</sub> H <sub>9</sub> N <sub>11</sub> O <sub>3</sub> |                               |
| Formula weight                    | 259.22                                                       |                               |
| Temperature                       | 150(2) K                                                     |                               |
| Wavelength                        | 0.71073 Å                                                    |                               |
| Crystal system                    | Monoclinic                                                   |                               |
| Space group                       | P2 <sub>1</sub> /c                                           |                               |
| Unit cell dimensions              | $a = 10.0682(5) \text{ \AA}$                                 | $\alpha = 90^\circ$ .         |
|                                   | $b = 9.9430(5) \text{ \AA}$                                  | $\beta = 97.5240(10)^\circ$ . |
|                                   | $c = 10.5715(6) \text{ \AA}$                                 | $\gamma = 90^\circ$ .         |
| Volume                            | 1049.18(10) Å <sup>3</sup>                                   |                               |
| Z                                 | 4                                                            |                               |
| Density (-123°C)                  | 1.641 Mg/m <sup>3</sup>                                      |                               |
| Density (20°C)                    | 1.623 Mg/m <sup>3</sup>                                      |                               |
| Absorption coefficient            | 0.139 mm <sup>-1</sup>                                       |                               |
| F(000)                            | 536                                                          |                               |
| Crystal size                      | 0.444 x 0.418 x 0.060 mm <sup>3</sup>                        |                               |
| Theta range for data collection   | 2.824 to 28.695°.                                            |                               |
| Index ranges                      | -13<=h<=13, -13<=k<=13, -14<=l<=14                           |                               |
| Reflections collected             | 10921                                                        |                               |
| Independent reflections           | 2708 [R <sub>int</sub> = 0.0159]                             |                               |
| Completeness to theta = 25.242°   | 99.9 %                                                       |                               |
| Absorption correction             | Semi-empirical from equivalents                              |                               |
| Max. and min. transmission        | 0.7460 and 0.7063                                            |                               |
| Refinement method                 | Full-matrix least-squares on F <sup>2</sup>                  |                               |
| Data / restraints / parameters    | 2708 / 0 / 165                                               |                               |
| Goodness-of-fit on F <sup>2</sup> | 1.054                                                        |                               |
| Final R indices [I>2sigma(I)]     | R <sub>1</sub> = 0.0313, wR <sub>2</sub> = 0.0859            |                               |
| R indices (all data)              | R <sub>1</sub> = 0.0334, wR <sub>2</sub> = 0.0887            |                               |
| Largest diff. peak and hole       | 0.284 and -0.350 e.Å <sup>-3</sup>                           |                               |

**Table S2.** Crystal data and structure refinement for **6**.

|                                   |                                                               |                             |
|-----------------------------------|---------------------------------------------------------------|-----------------------------|
| Identification code               | <b>6</b>                                                      |                             |
| CCDC number                       | 1480144                                                       |                             |
| Empirical formula                 | C <sub>4</sub> H <sub>13</sub> N <sub>13</sub> O <sub>7</sub> |                             |
| Formula weight                    | 355.27                                                        |                             |
| Temperature                       | 150(2) K                                                      |                             |
| Wavelength                        | 0.71073 Å                                                     |                             |
| Crystal system                    | Monoclinic                                                    |                             |
| Space group                       | P2 <sub>1</sub> /c                                            |                             |
| Unit cell dimensions              | $a = 3.8438(8)$ Å                                             | $\alpha = 90^\circ$ .       |
|                                   | $b = 14.463(3)$ Å                                             | $\beta = 90.988(3)^\circ$ . |
|                                   | $c = 23.861(5)$ Å                                             | $\gamma = 90^\circ$ .       |
| Volume                            | 1326.3(5) Å <sup>3</sup>                                      |                             |
| Z                                 | 4                                                             |                             |
| Density (-123°C)                  | 1.779 Mg/m <sup>3</sup>                                       |                             |
| Density (20°C)                    | 1.748 Mg/m <sup>3</sup>                                       |                             |
| Absorption coefficient            | 0.162 mm <sup>-1</sup>                                        |                             |
| Max. and min. transmission        | 0.5637 and 0.7460                                             |                             |
| F(000)                            | 736                                                           |                             |
| Crystal size                      | 0.220 x 0.040 x 0.040 mm <sup>3</sup>                         |                             |
| Theta range for data collection   | 1.707 to 29.992°.                                             |                             |
| Index ranges                      | -5 ≤ h ≤ 5, -19 ≤ k ≤ 20, -30 ≤ l ≤ 32                        |                             |
| Reflections collected             | 14056                                                         |                             |
| Independent reflections           | 3749 [R <sub>int</sub> = 0.1177]                              |                             |
| Completeness to theta = 25.242°   | 99.9 %                                                        |                             |
| Refinement method                 | Full-matrix least-squares on F <sup>2</sup>                   |                             |
| Data / restraints / parameters    | 3749 / 3 / 227                                                |                             |
| Goodness-of-fit on F <sup>2</sup> | 0.970                                                         |                             |
| Final R indices [I > 2σ(I)]       | R <sub>1</sub> = 0.0610, wR <sub>2</sub> = 0.1097             |                             |
| R indices (all data)              | R <sub>1</sub> = 0.1541, wR <sub>2</sub> = 0.1363             |                             |
| Largest diff. peak and hole       | 0.409 and -0.338 e.Å <sup>-3</sup>                            |                             |

**Table S3.** Crystal data and structure refinement for 7.

|                                   |                                                                                                                                |
|-----------------------------------|--------------------------------------------------------------------------------------------------------------------------------|
| Identification code               | 7                                                                                                                              |
| CCDC number                       | 1480145                                                                                                                        |
| Empirical formula                 | C <sub>4</sub> H <sub>3</sub> N <sub>11</sub> O <sub>4</sub> , 2(H <sub>5</sub> N <sub>2</sub> ), 1/2(H <sub>2</sub> O)        |
| Formula weight                    | 344.30                                                                                                                         |
| Temperature                       | 150(2) K                                                                                                                       |
| Wavelength                        | 1.54178 Å                                                                                                                      |
| Crystal system                    | Orthorhombic                                                                                                                   |
| Space group                       | Pna2 <sub>1</sub>                                                                                                              |
| Unit cell dimensions              | $a = 16.6803(14)$ Å $\alpha = 90^\circ$ .<br>$b = 3.7404(3)$ Å $\beta = 90^\circ$ .<br>$c = 42.897(4)$ Å $\gamma = 90^\circ$ . |
| Volume                            | 2676.4(4) Å <sup>3</sup>                                                                                                       |
| Z                                 | 8                                                                                                                              |
| Density (-123°C)                  | 1.709 Mg/m <sup>3</sup>                                                                                                        |
| Density (20°C)                    | 1.685 Mg/m <sup>3</sup>                                                                                                        |
| Absorption coefficient            | 1.295 mm <sup>-1</sup>                                                                                                         |
| Max. and min. transmission        | 0.7531 and 0.5874                                                                                                              |
| F(000)                            | 1432                                                                                                                           |
| Crystal size                      | 0.160 x 0.050 x 0.030 mm <sup>3</sup>                                                                                          |
| Theta range for data collection   | 2.060 to 68.228°.                                                                                                              |
| Index ranges                      | -20 ≤ h ≤ 20, -4 ≤ k ≤ 3, -41 ≤ l ≤ 48                                                                                         |
| Reflections collected             | 12868                                                                                                                          |
| Independent reflections           | 4085 [R <sub>int</sub> = 0.0526]                                                                                               |
| Completeness to theta = 67.679°   | 96.0 %                                                                                                                         |
| Refinement method                 | Full-matrix least-squares on F <sup>2</sup>                                                                                    |
| Data / restraints / parameters    | 4085 / 16 / 458                                                                                                                |
| Goodness-of-fit on F <sup>2</sup> | 1.076                                                                                                                          |
| Final R indices [I > 2σ(I)]       | R <sub>1</sub> = 0.0493, wR <sub>2</sub> = 0.1281                                                                              |
| R indices (all data)              | R <sub>1</sub> = 0.0510, wR <sub>2</sub> = 0.1299                                                                              |
| Absolute structure parameter      | 0.4(2)                                                                                                                         |
| Largest diff. peak and hole       | 0.545 and -0.348 e.Å <sup>-3</sup>                                                                                             |

**Table S4.** Hydrogen bonds for **4** [Å and °].

| D-H...A                | d(D-H) | d(H...A) | d(D...A)   | <(DHA) |
|------------------------|--------|----------|------------|--------|
| N(6)-H(6)...O(1)       | 0.88   | 2.11     | 2.5871(10) | 113.6  |
| N(16)-H(16A)...N(7)#2  | 0.88   | 2.39     | 3.1999(12) | 153.6  |
| N(16)-H(16B)...O(2)#3  | 0.88   | 2.18     | 2.9805(11) | 150.7  |
| O(17)-H(17)...O(1)#5   | 0.84   | 1.93     | 2.7631(10) | 174.2  |
| N(18)-H(18A)...N(9)#6  | 0.91   | 1.93     | 2.7981(11) | 159.9  |
| N(18)-H(18B)...O(2)#7  | 0.91   | 1.90     | 2.7958(11) | 166.4  |
| N(18)-H(18B)...N(3)#7  | 0.91   | 2.49     | 3.3666(11) | 160.7  |
| N(18)-H(18C)...N(13)#8 | 0.91   | 2.03     | 2.9114(11) | 163.1  |

Symmetry transformations used to generate equivalent atoms:

#1  $x, -y+1/2, z-1/2$     #2  $x, -y+1/2, z+1/2$     #3  $x-1, -y+1/2, z+1/2$   
 #4  $x-1, y, z$     #5  $-x+1, y+1/2, -z+1/2$     #6  $-x+1, -y+1, -z+1$   
 #7  $x, y, z+1$     #8  $-x, -y+1, -z+1$

**Table S5.** Hydrogen bonds for **6** [Å and °].

| D-H...A                | d(D-H)    | d(H...A)  | d(D...A) | <(DHA) |
|------------------------|-----------|-----------|----------|--------|
| N(6)-H(6)...O(2)       | 0.88      | 2.13      | 2.611(3) | 113.4  |
| N(6)-H(6)...N(13)#1    | 0.88      | 2.22      | 3.055(3) | 157.8  |
| N(20)-H(20B)...O(19)#2 | 0.91      | 1.92      | 2.812(3) | 165.2  |
| N(20)-H(20A)...N(4)    | 0.91      | 1.97      | 2.845(3) | 160.5  |
| O(21)-H(21)...N(9)#2   | 0.84      | 1.79      | 2.621(3) | 167.7  |
| N(22)-H(22C)...O(19)#3 | 0.91      | 2.14      | 2.956(3) | 149.0  |
| N(22)-H(22B)...O(18)#4 | 0.91      | 2.23      | 2.908(3) | 131.3  |
| N(22)-H(22A)...O(24)#2 | 0.91      | 1.86      | 2.767(3) | 174.8  |
| O(23)-H(23)...N(14)#4  | 0.84      | 1.85      | 2.680(3) | 170.4  |
| O(24)-H(24B)...O(2)#3  | 0.831(10) | 2.194(12) | 3.019(3) | 172(4) |
| O(24)-H(24A)...N(7)#5  | 0.831(10) | 2.38(3)   | 2.994(3) | 131(3) |

Symmetry transformations used to generate equivalent atoms:

#1  $-x+2, y-1/2, -z+1/2$     #2  $-x+1, -y+1, -z+1$     #3  $-x+2, -y+1, -z+1$   
 #4  $x, y-1, z$     #5  $x, -y+3/2, z+1/2$

**Table S6.** Hydrogen bonds for **7** [ $\text{\AA}$  and  $^\circ$ ].

| D-H...A                | d(D-H)    | d(H...A)  | d(D...A) | <(DHA) |
|------------------------|-----------|-----------|----------|--------|
| N(6)-H(6)...O(1)       | 0.88      | 2.03      | 2.535(5) | 115.3  |
| N(6)-H(6)...N(13)#1    | 0.88      | 2.15      | 2.943(5) | 149.5  |
| N(25)-H(25)...O(20)    | 0.88      | 2.05      | 2.546(5) | 115.0  |
| N(25)-H(25)...N(32)#2  | 0.88      | 2.15      | 2.946(5) | 151.0  |
| N(39)-H(39A)...O(21)#3 | 0.91      | 2.05      | 2.919(5) | 158.0  |
| N(39)-H(39C)...O(47)   | 0.91      | 2.18      | 2.960(5) | 143.6  |
| N(40)-H(40A)...N(28)#4 | 0.908(14) | 2.10(2)   | 2.985(6) | 165(5) |
| N(40)-H(40B)...O(20)#3 | 0.915(14) | 2.21(4)   | 2.966(5) | 140(5) |
| N(41)-H(41B)...N(14)#1 | 0.91      | 2.00      | 2.881(6) | 161.2  |
| N(41)-H(41C)...O(37)   | 0.91      | 2.02      | 2.851(7) | 151.1  |
| N(42)-H(42A)...N(7)    | 0.915(14) | 2.195(16) | 3.106(6) | 174(5) |
| N(42)-H(42B)...O(18)   | 0.913(14) | 2.216(18) | 3.120(6) | 170(5) |
| N(43)-H(43A)...N(33)#2 | 0.91      | 1.98      | 2.863(6) | 162.1  |
| N(43)-H(43C)...O(18)#2 | 0.91      | 2.08      | 2.878(6) | 146.4  |
| N(44)-H(44A)...O(37)   | 0.915(14) | 2.16(2)   | 3.055(6) | 165(5) |
| N(44)-H(44B)...N(26)   | 0.914(14) | 2.22(2)   | 3.107(6) | 164(5) |
| N(45)-H(45A)...O(2)#1  | 0.91      | 2.12      | 2.929(5) | 148.4  |
| N(45)-H(45A)...O(21)#5 | 0.91      | 2.35      | 2.803(5) | 110.2  |
| N(45)-H(45B)...O(47)#5 | 0.91      | 2.15      | 2.947(6) | 145.6  |
| N(46)-H(46A)...O(1)#1  | 0.909(14) | 2.11(3)   | 2.961(5) | 156(5) |
| N(46)-H(46B)...N(9)#6  | 0.910(14) | 2.083(17) | 2.986(6) | 172(5) |
| O(47)-H(47B)...N(23)   | 0.822(14) | 2.25(2)   | 3.035(6) | 160(6) |
| O(47)-H(47A)...N(4)#7  | 0.823(14) | 2.225(17) | 3.039(6) | 171(6) |

Symmetry transformations used to generate equivalent atoms:

#1  $x-1/2, -y+1/2, z$     #2  $x-1/2, -y+3/2, z$     #3  $x+1/2, -y+1/2, z$

#4  $x, y-1, z$     #5  $-x+1/2, y+1/2, z-1/2$     #6  $x-1, y, z$

#7  $-x+3/2, y+1/2, z+1/2$

## 2 Theoretical Calculations

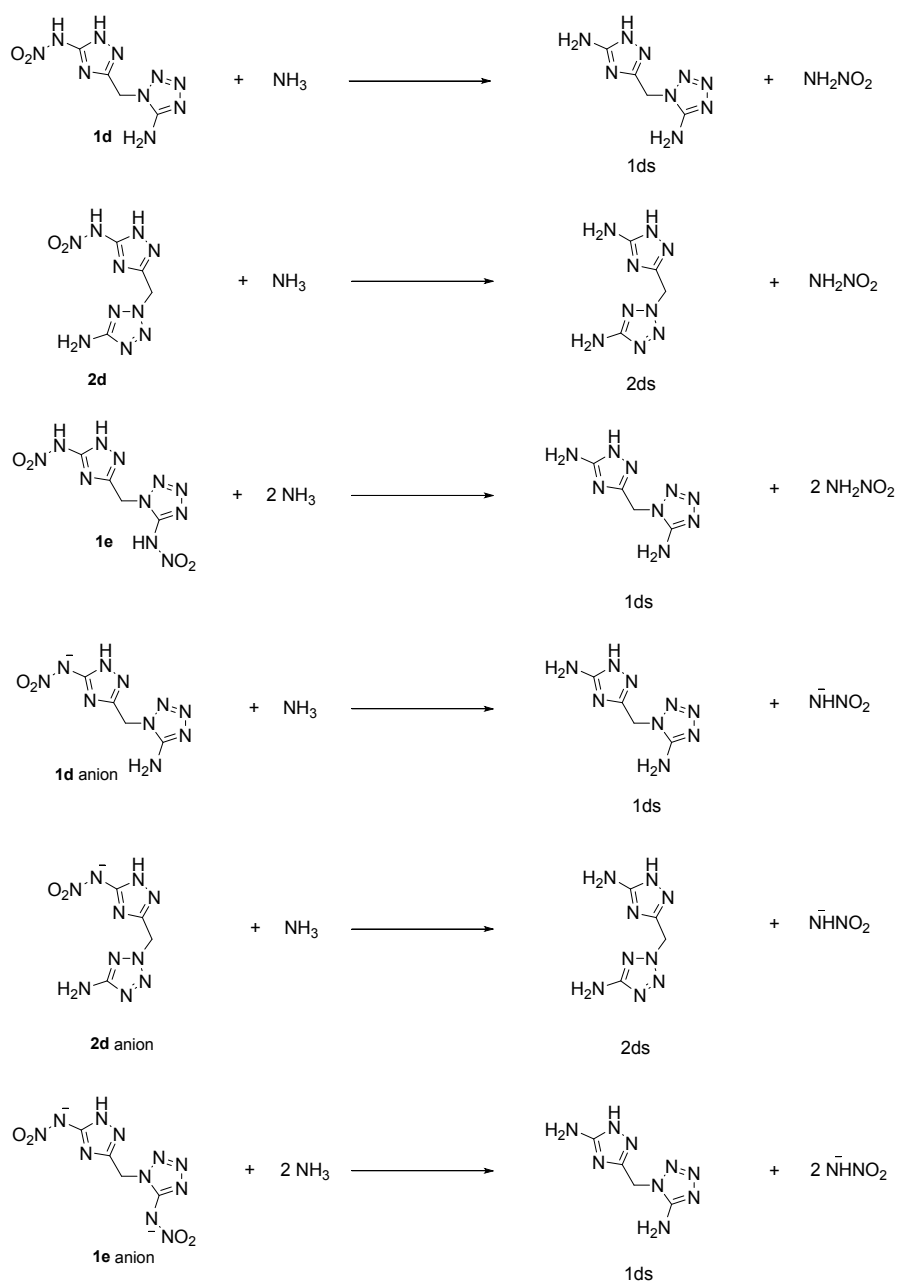

**Scheme S1.** Isodesmic reactions



**Table S1.** Calculated zero point energy ( $ZPE$ ), values of the correction ( $H_r$ ), total energy ( $E_0$ ) and gas phase heats of formation ( $HOF$ )

| Species                         | $ZPE$    | $H_r$    | $E_0$        | corrected $E_0$ | $HOF$<br>(kJ mol <sup>-1</sup> ) |
|---------------------------------|----------|----------|--------------|-----------------|----------------------------------|
| <b>1d</b>                       | 0.152204 | 0.166437 | -851.88753   | -851.72718      | 555.303446                       |
| <b>2d</b>                       | 0.152113 | 0.166593 | -851.8920287 | -851.73152      | 555.8469444                      |
| <b>1e</b>                       | 0.154239 | 0.170958 | -1055.959161 | -1055.79437     | 608.2414761                      |
| <b>1d anion</b>                 | 0.139321 | 0.15281  | -851.3886417 | -851.24140      | 401.4549518                      |
| <b>2d anion</b>                 | 0.139129 | 0.153027 | -851.3818416 | -851.23438      | 431.8344718                      |
| <b>1e anion</b>                 | 0.127708 | 0.143729 | -1054.854823 | -1054.71620     | 580.4663442                      |
| 1ds                             | 0.149669 | 0.16167  | -647.8144792 | -647.65880      | 505.5 <sup>[a]</sup>             |
| 2ds                             | 0.14967  | 0.161905 | -647.8180796 | -647.66216      | 508.6 <sup>[a]</sup>             |
| NH <sub>2</sub> NO <sub>2</sub> | 0.039257 | 0.043909 | -260.4931748 | -260.45804      | -6.11 <sup>[a]</sup>             |
| NH <sub>3</sub>                 | 0.034384 | 0.038203 | -56.4154647  | -56.37864       | -45.9 <sup>[b]</sup>             |
| NHNO <sub>2</sub> anion         | 0.026168 | 0.030444 | -259.936099  | -259.90670      | -6.74 <sup>[a]</sup>             |

[a] Data obtained from G2.

[b] Data are from Ref. [D. R. Lide, ed., CRC Handbook of Chemistry and Physics, 88th Edition (Internet Version 2008), CRC Press/Taylor and Francis, Boca Raton, FL.].

**Table S2.** Calculated the solid state heat of formation ( $HOF$ )

| Compound | $\Delta H_L$ (kJ mol <sup>-1</sup> ) | $\Delta H_f^{\text{Cation}}$<br>(kJ mol <sup>-1</sup> ) | $\Delta H_f^{\text{Anion}}$<br>(kJ mol <sup>-1</sup> ) | $\Delta H_f^{298}$<br>(kJ mol <sup>-1</sup> ) |
|----------|--------------------------------------|---------------------------------------------------------|--------------------------------------------------------|-----------------------------------------------|
| <b>4</b> | 473.0994451                          | 669.5                                                   | 401.45                                                 | 597.9                                         |
| <b>5</b> | 480.338003                           | 669.5                                                   | 434.83                                                 | 621.0                                         |
| <b>6</b> | 1275.947408                          | 669.5                                                   | 580.5                                                  | 643.5                                         |
| <b>7</b> | 1270.39435                           | 770                                                     | 580.5                                                  | 850.1                                         |
| <b>8</b> | 1293.833856                          | 626.4                                                   | 580.5                                                  | 539.4                                         |

### 3 NMR Spectra

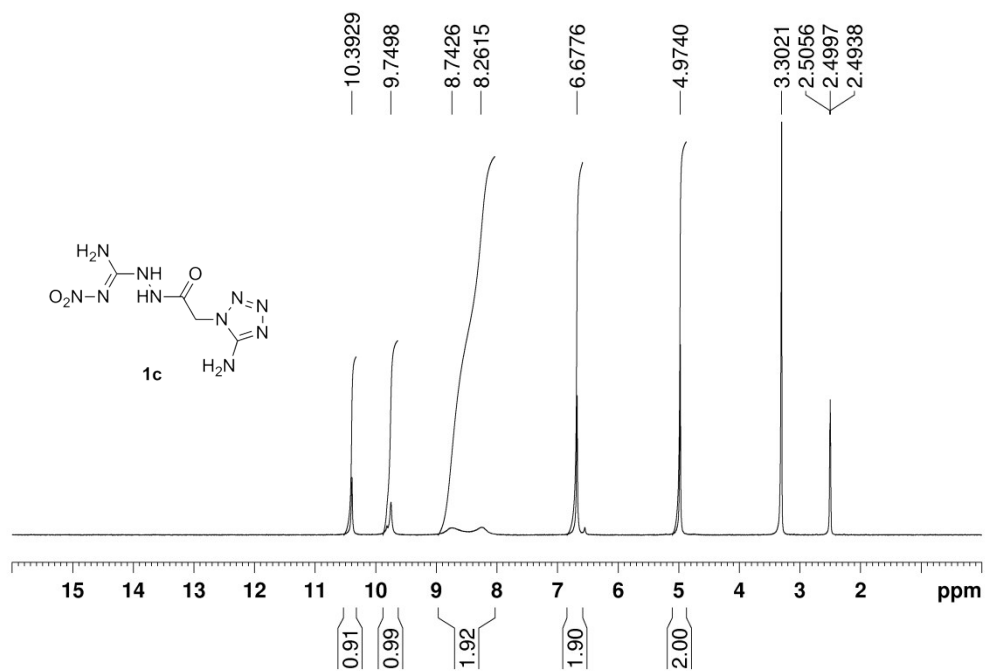

**Figure S1.** <sup>1</sup>H NMR spectrum of **1c**

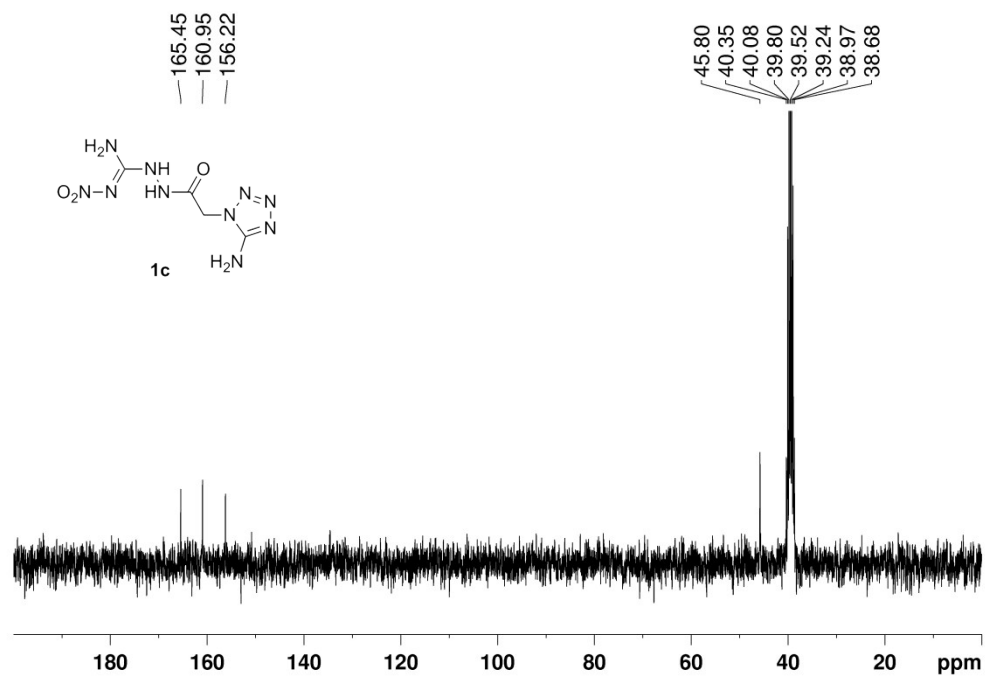

**Figure S2** <sup>13</sup>C NMR spectrum of **1c**

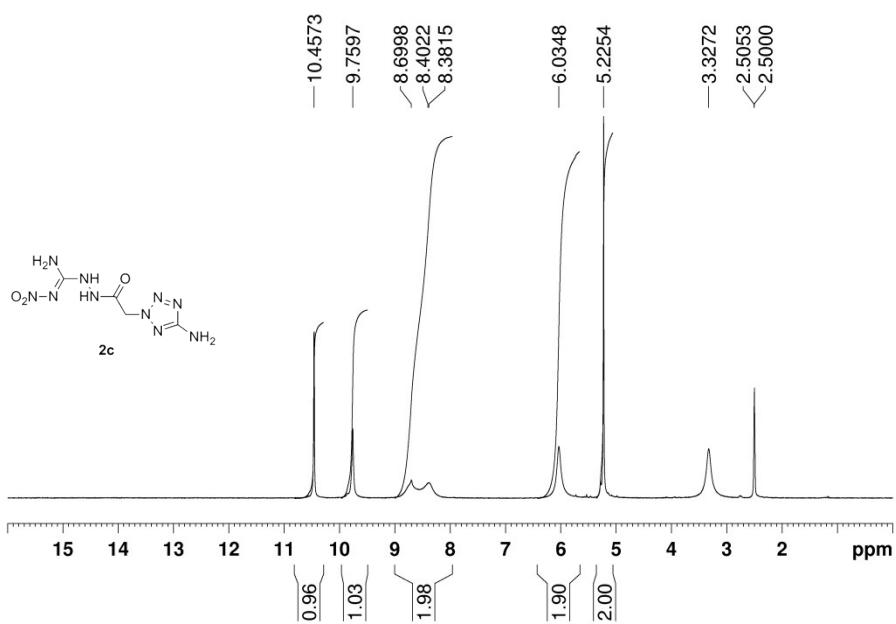

**Figure S3.** <sup>1</sup>H NMR spectrum of **2c**

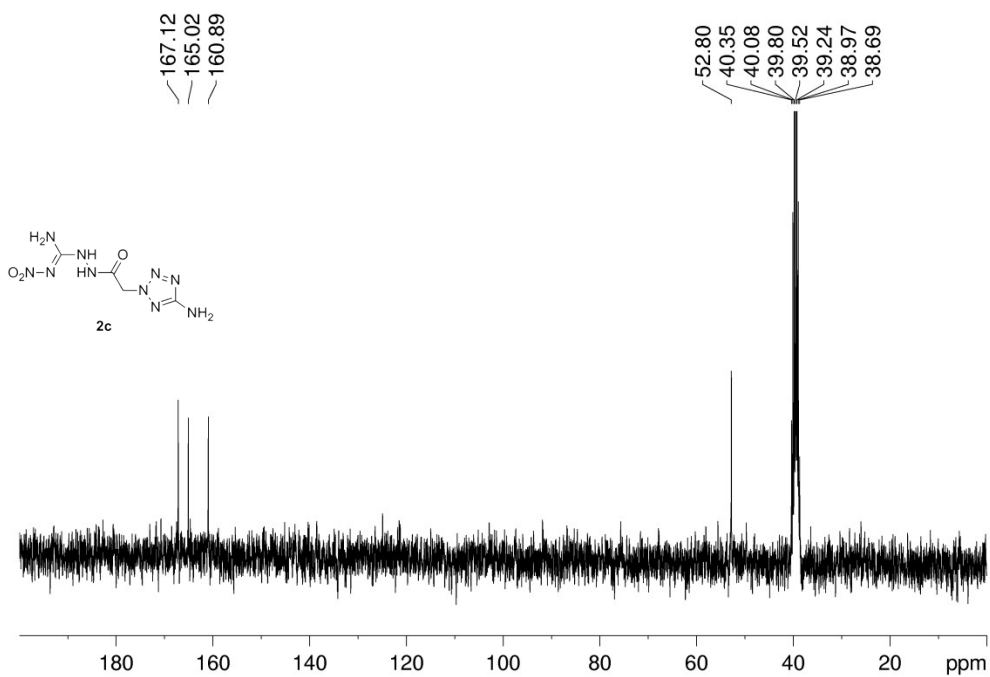

**Figure S4.** <sup>13</sup>C NMR spectrum of **2c**

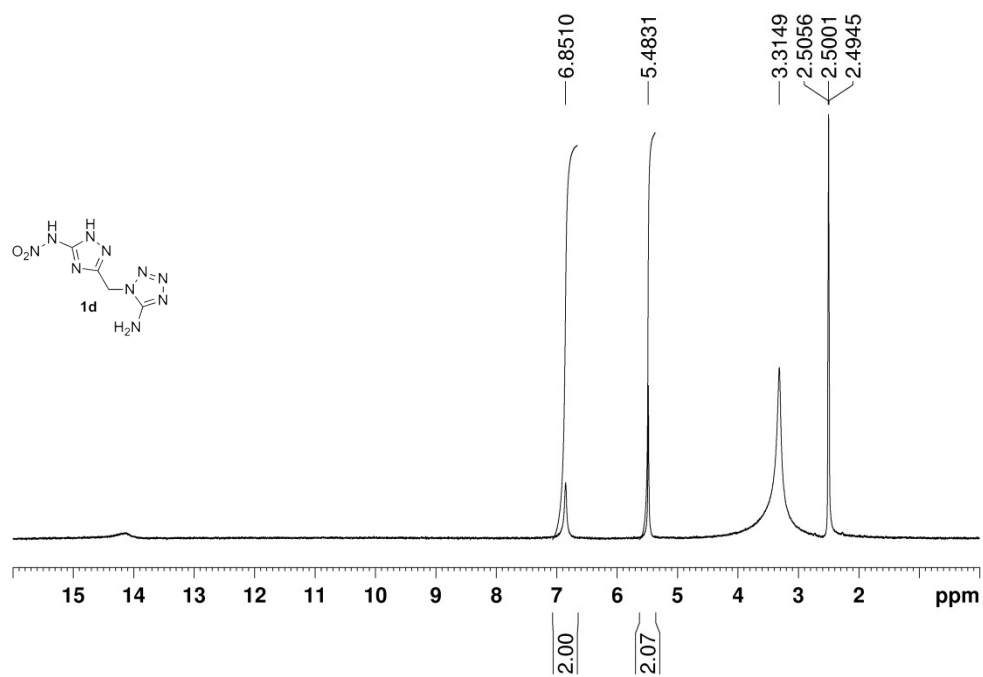

**Figure S5.** <sup>1</sup>H NMR spectrum of **1d**

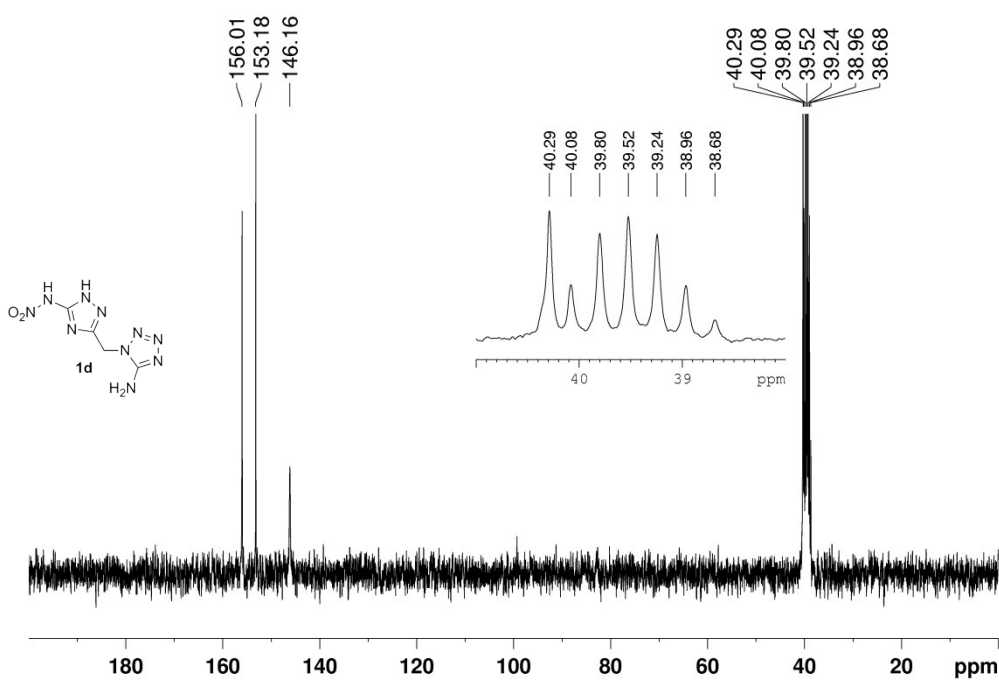

**Figure S6.** <sup>13</sup>C NMR spectrum of **1d**

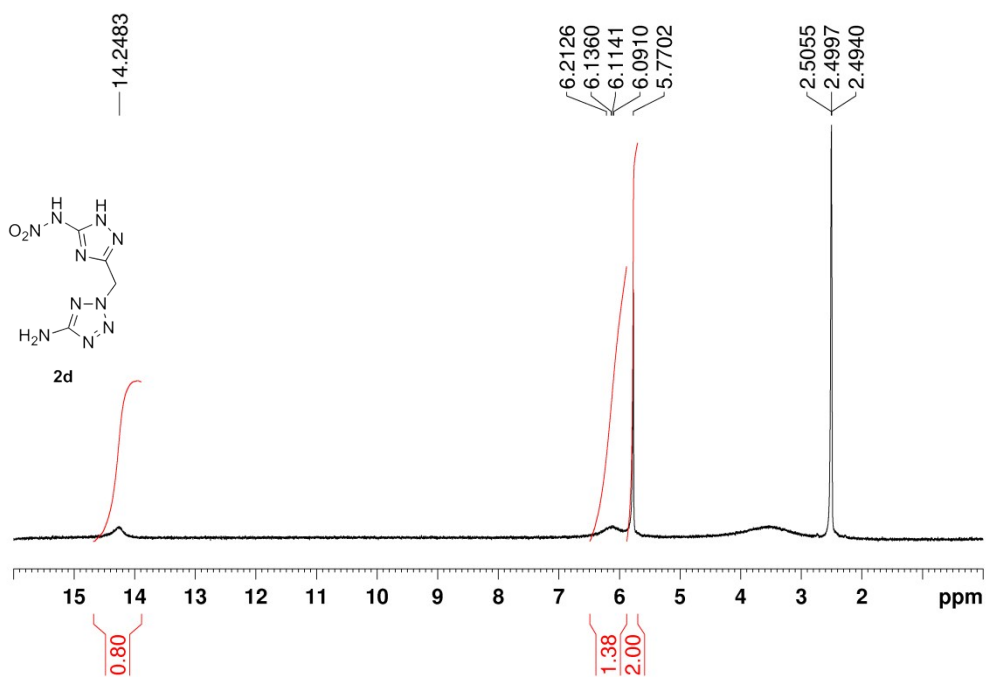

**Figure S7.** <sup>1</sup>H NMR spectrum of **2d**

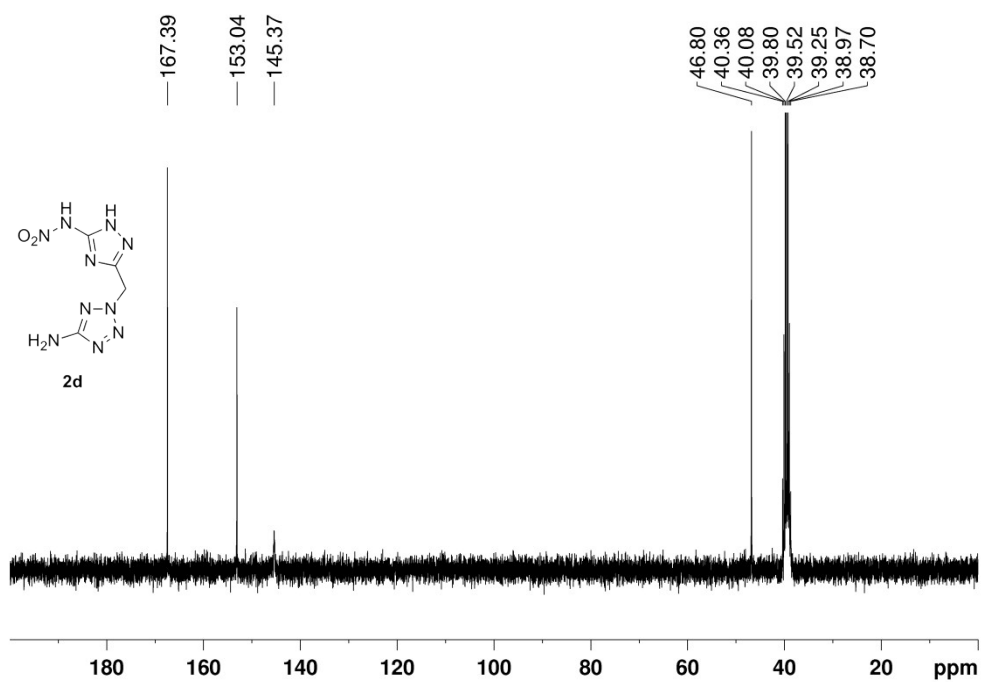

**Figure S8.** <sup>13</sup>C NMR spectrum of **2d**

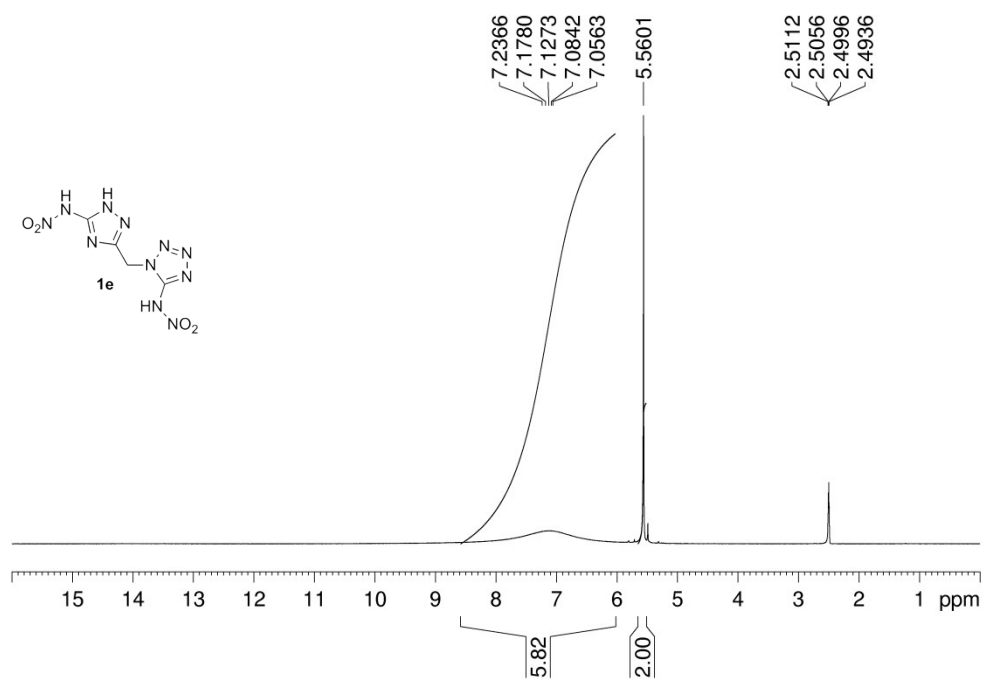

**Figure S9.** <sup>1</sup>H NMR spectrum of **1e**

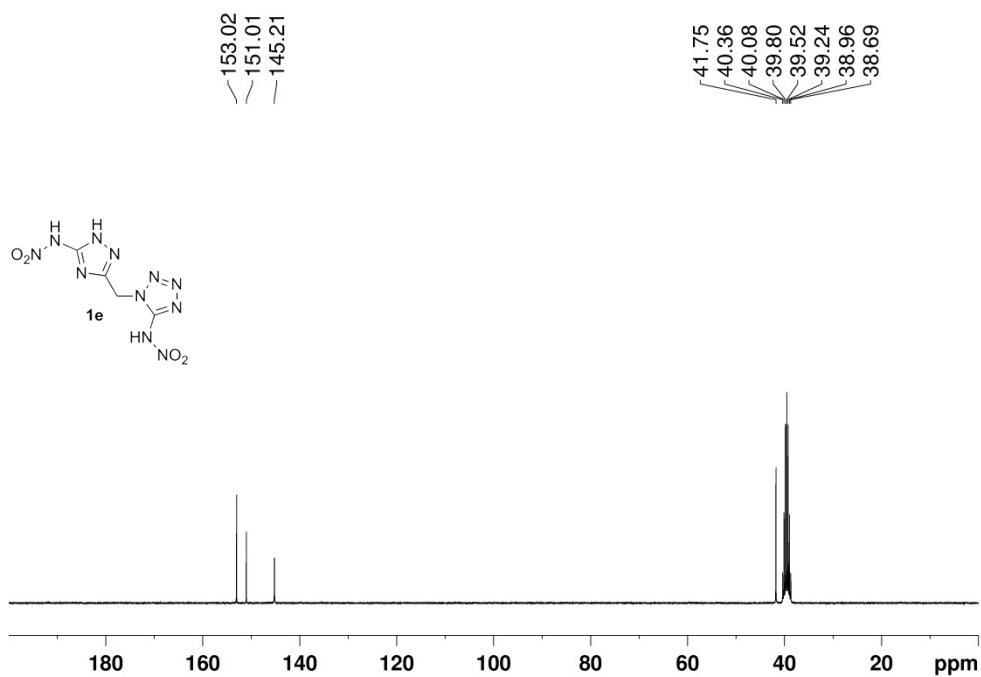

**Figure S10.** <sup>13</sup>C NMR spectrum of **1e**

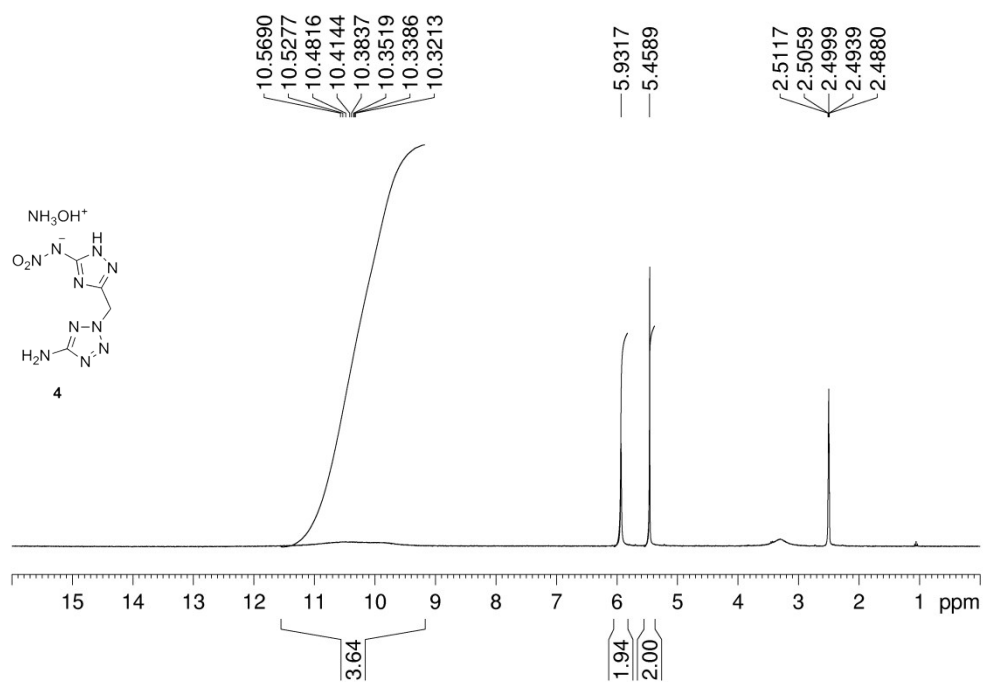

**Figure S11.**  $^1\text{H NMR}$  spectrum of **4**

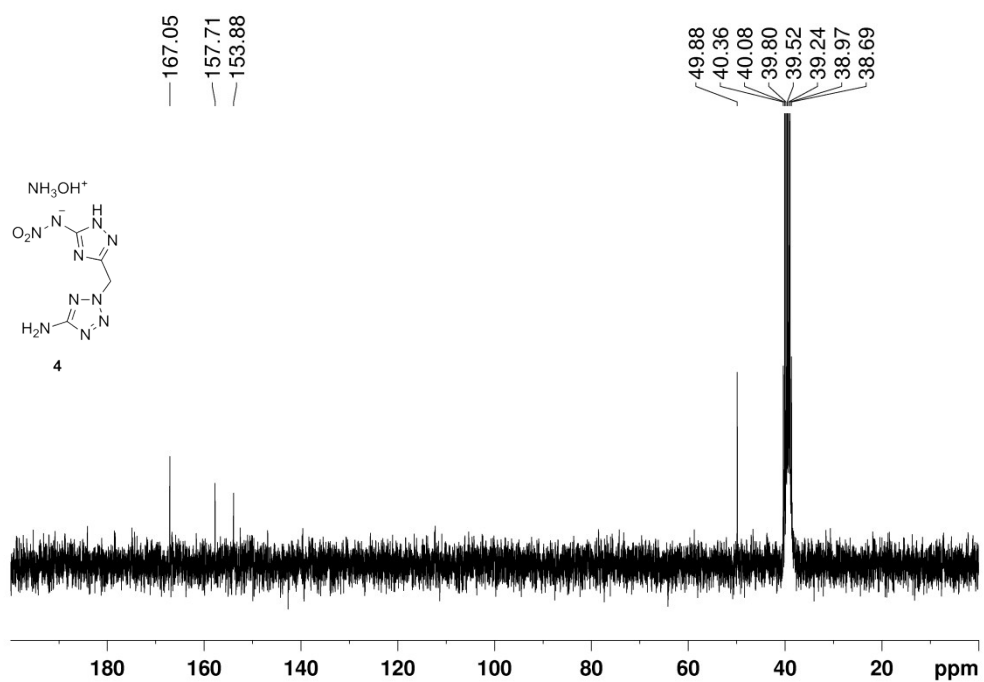

**Figure S12.**  $^{13}\text{C NMR}$  spectrum of **4**

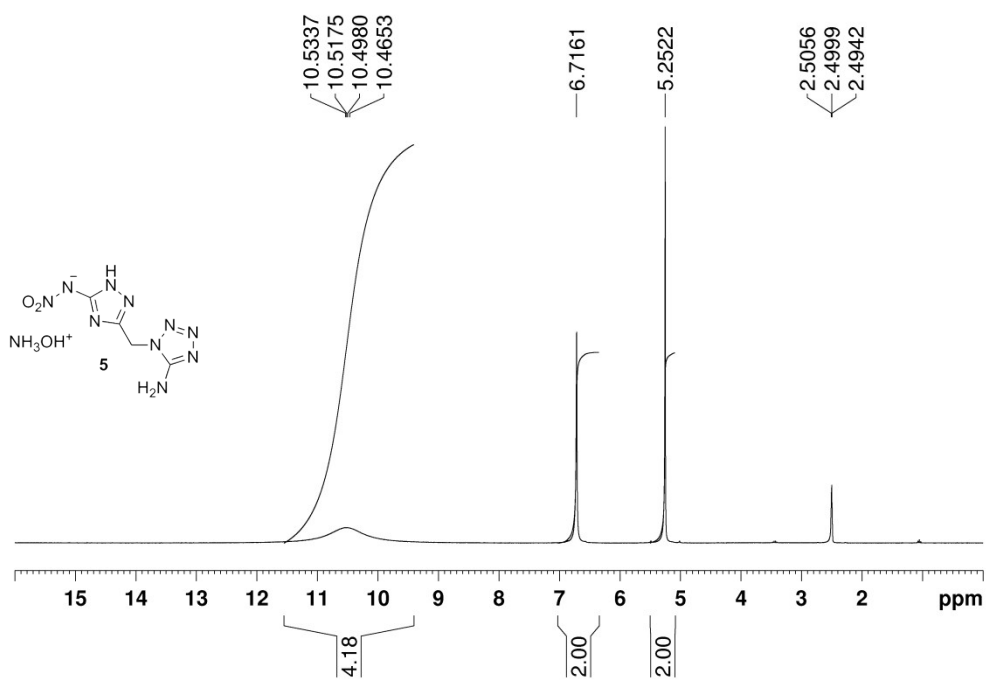

**Figure S13.**  $^1\text{H}$  NMR spectrum of **5**

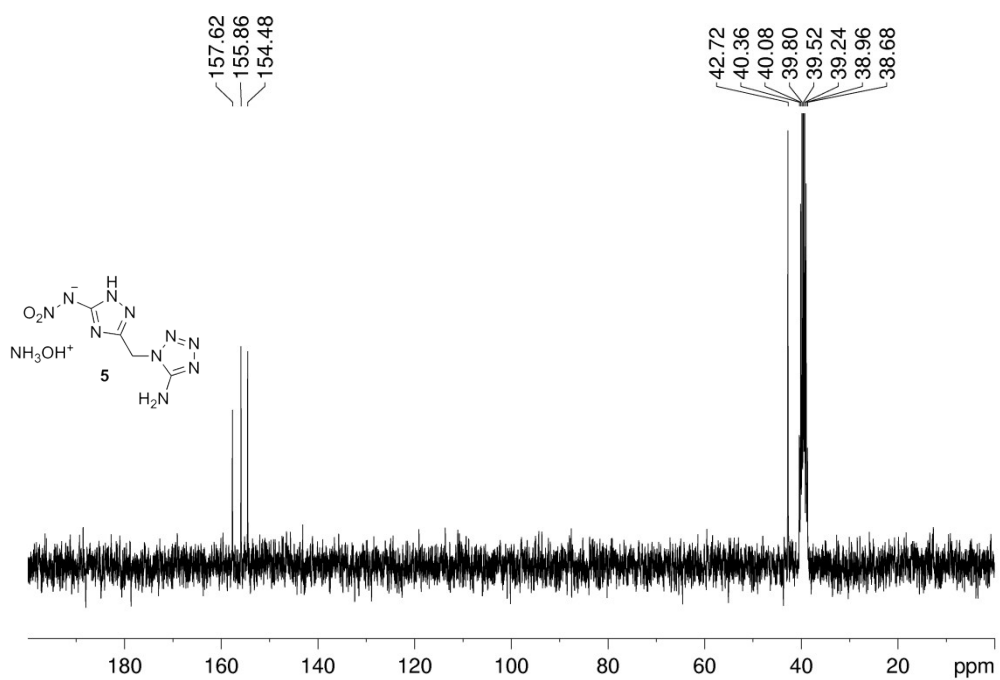

**Figure S14.**  $^{13}\text{C}$  NMR spectrum of **5**



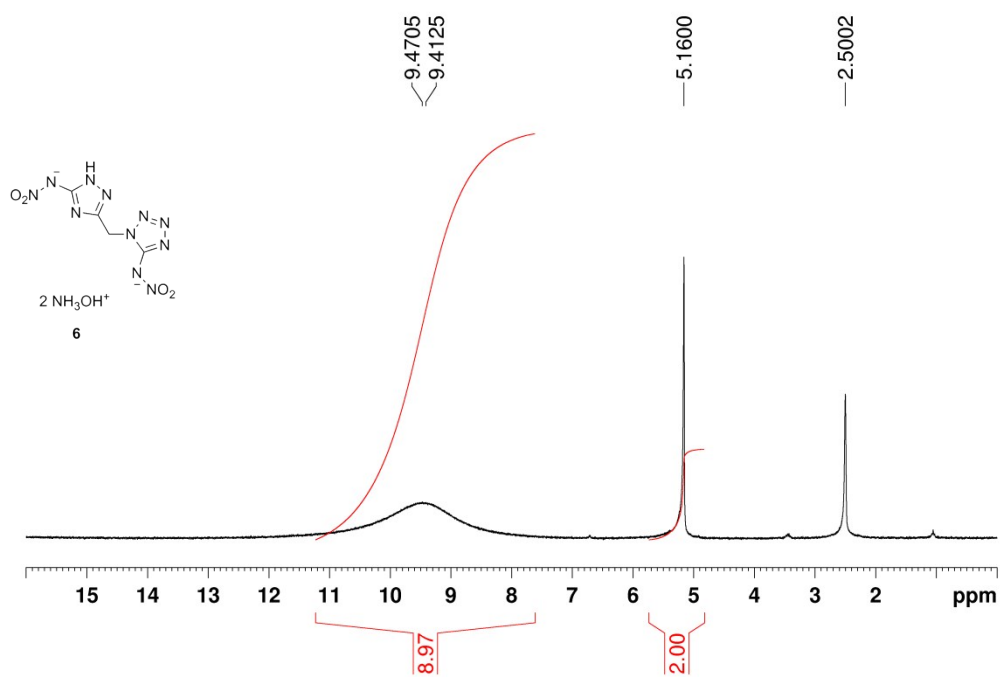

**Figure S15.**  $^1\text{H}$  NMR spectrum of **6**

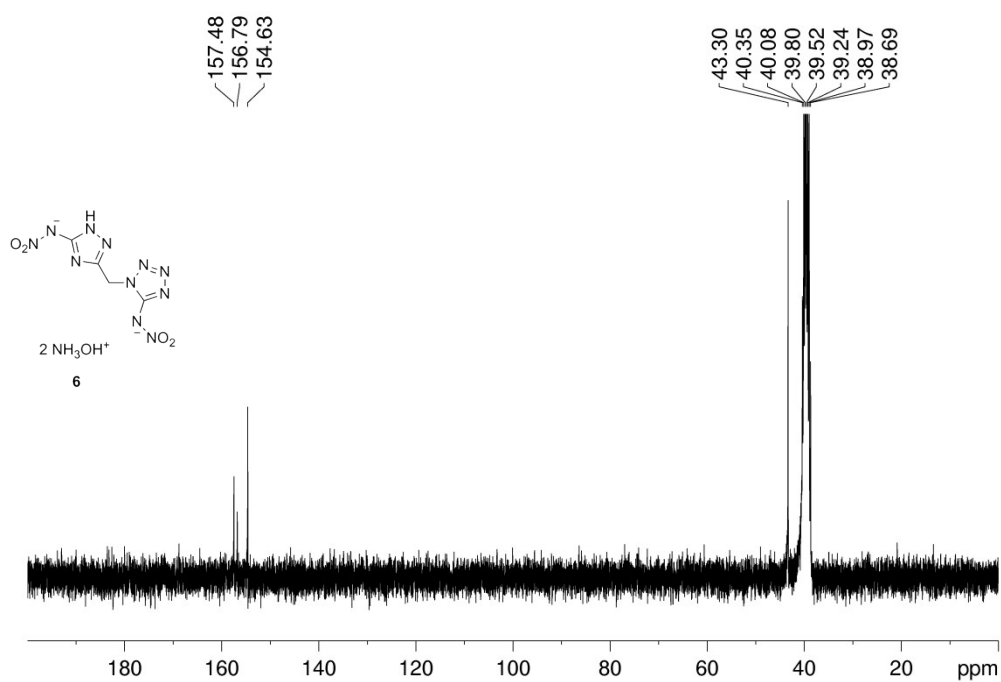

**Figure S16.**  $^{13}\text{C}$  NMR spectrum of **6**

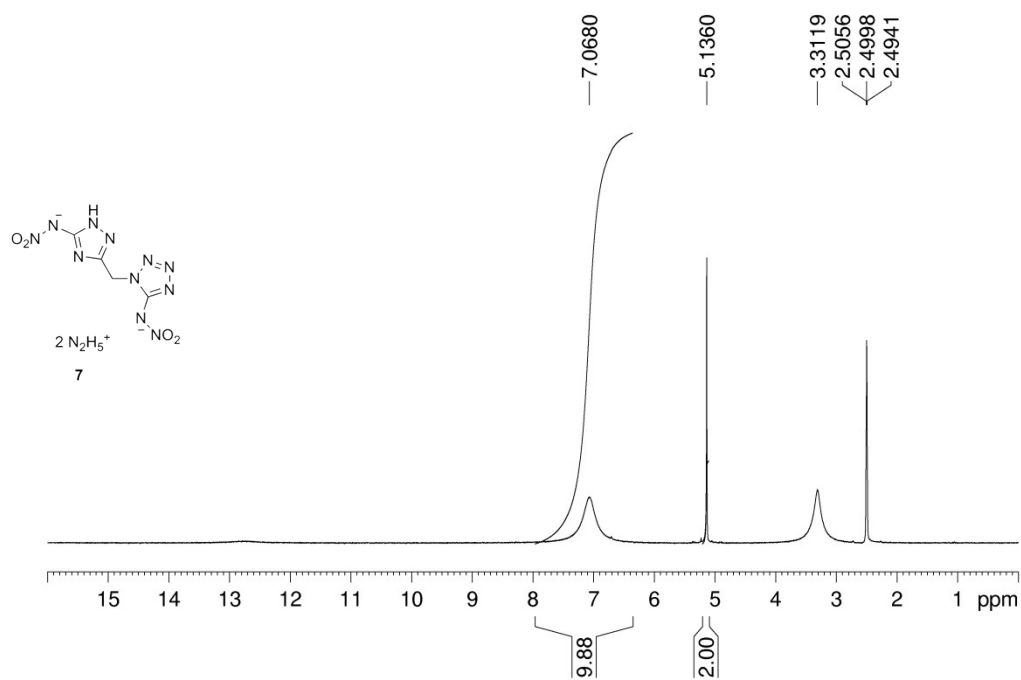

Figure S17.  $^1\text{H}$  NMR spectrum of 7

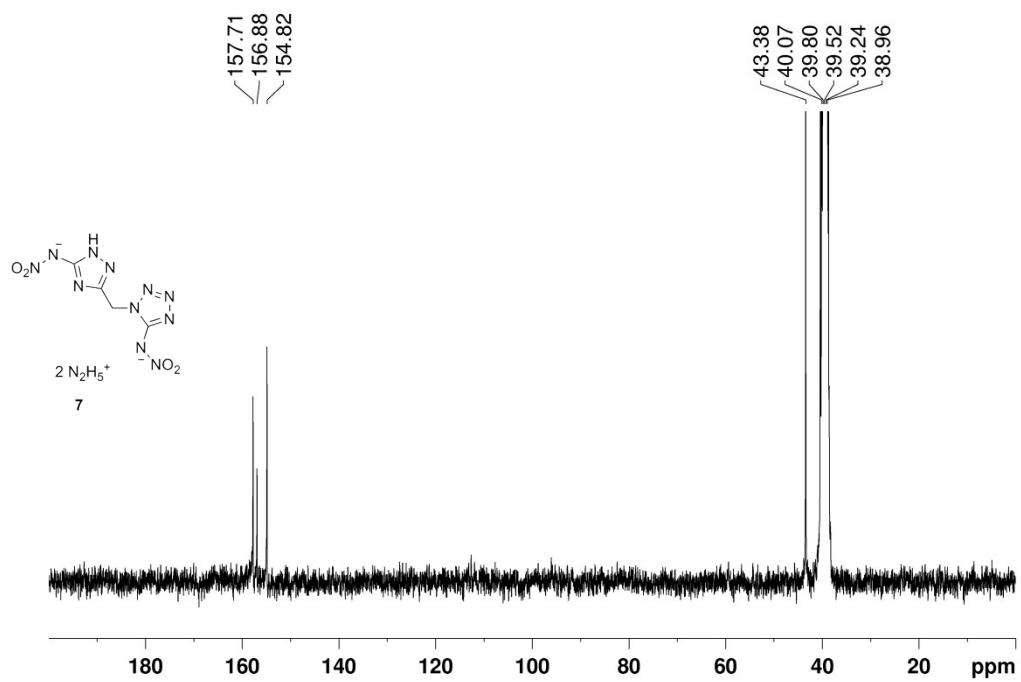

Figure S18.  $^{13}\text{C}$  NMR spectrum of 7

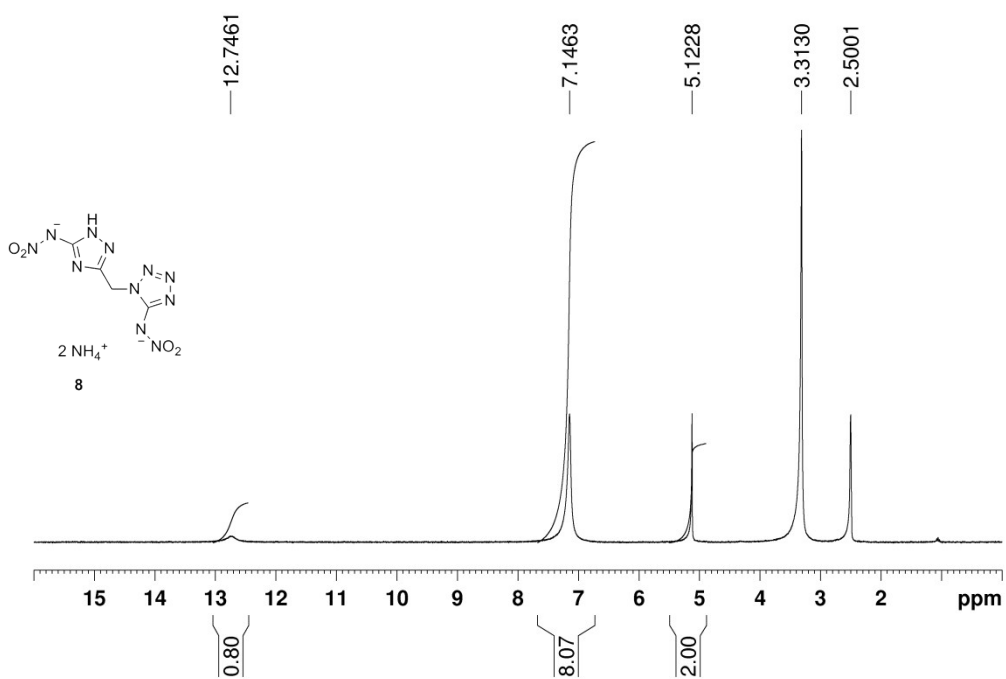

**Figure S19.**  $^1\text{H}$  NMR spectrum of **8**

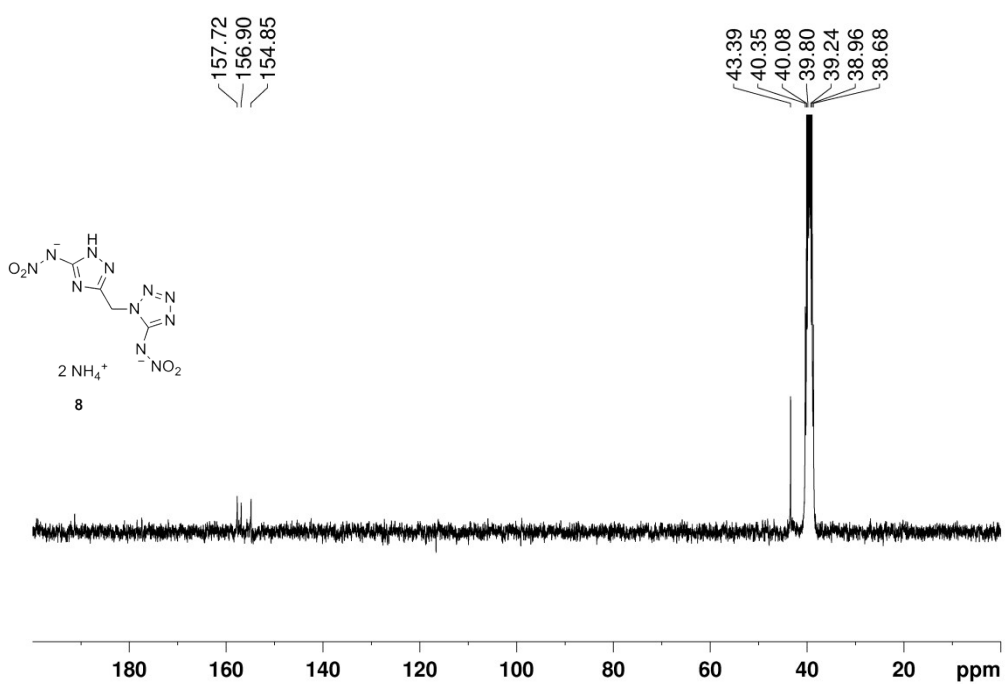

**Figure S20.**  $^{13}\text{C}$  NMR spectrum of **8**

## 4 DSC plots

Sample: NH<sub>2</sub>TetrazoleCH<sub>2</sub>NHNO<sub>2</sub>Triazole  
Size: 1.0000 mg  
Method: Ramp

DSC

File: C:\...\NH<sub>2</sub>TetrazoleCH<sub>2</sub>NHNO<sub>2</sub>Triazole.001  
Operator: tyx  
Run Date: 08-Dec-2015 20:33  
Instrument: DSC Q20 V24.11 Build 124

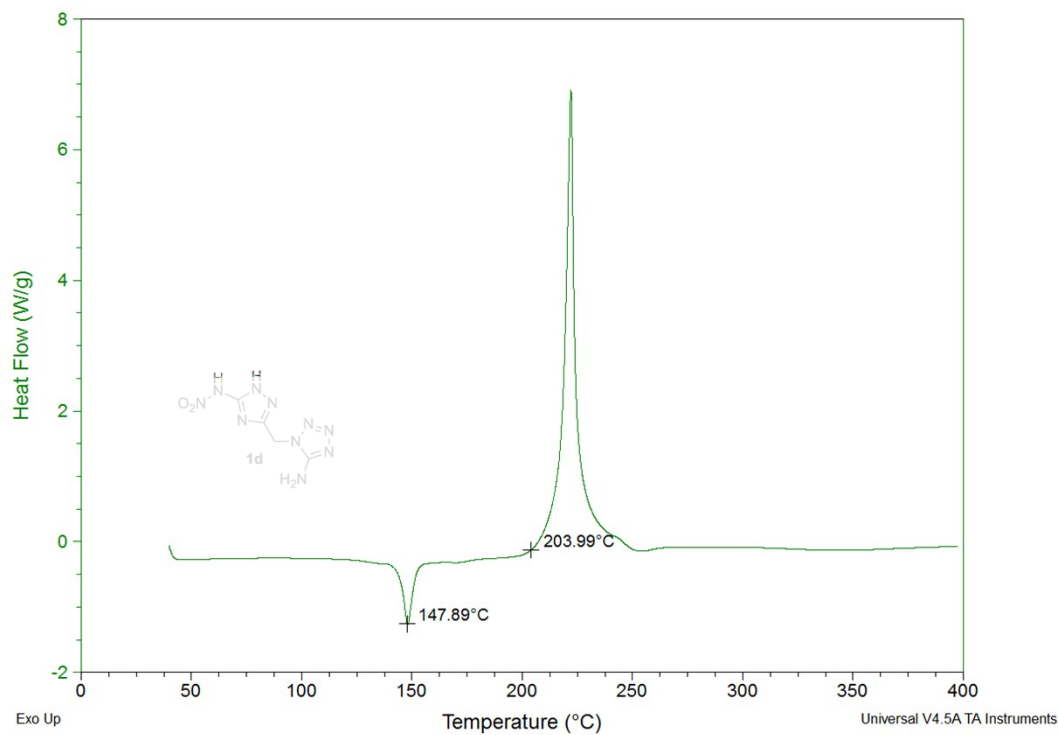

Sample: 5-aminoTetraz-2-CH<sub>2</sub>-NHNO<sub>2</sub>Triazol  
Size: 1.4000 mg  
Method: Ramp

DSC

File: 5-aminoTetraz-2-CH<sub>2</sub>-NHNO<sub>2</sub>Triazole-2.001  
Operator: TYX  
Run Date: 16-Dec-2015 16:46  
Instrument: DSC Q20 V24.11 Build 124

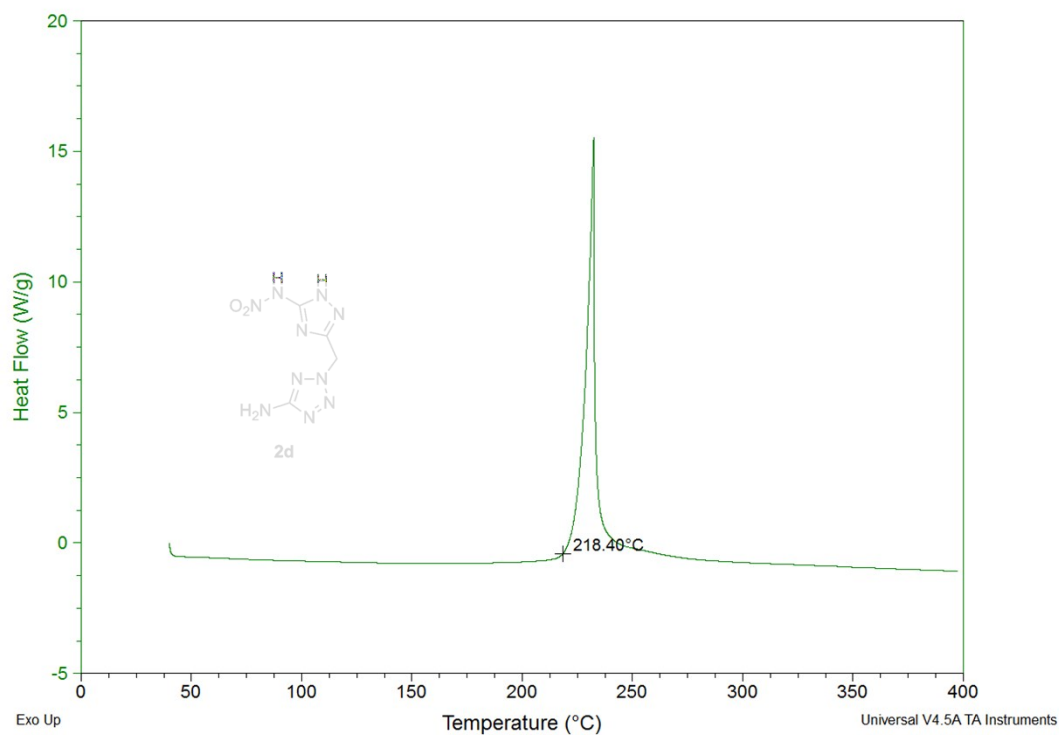

Sample: NHNO2T-1CH2-NHNO2Triz ZX  
Size: 0.5000 mg  
Method: Ramp

DSC

File: C:\...\NHNO2T-1CH2-NHNO2Triz ZX.001  
Operator: TYX  
Run Date: 18-Jan-2016 10:21  
Instrument: DSC Q20 V24.11 Build 124

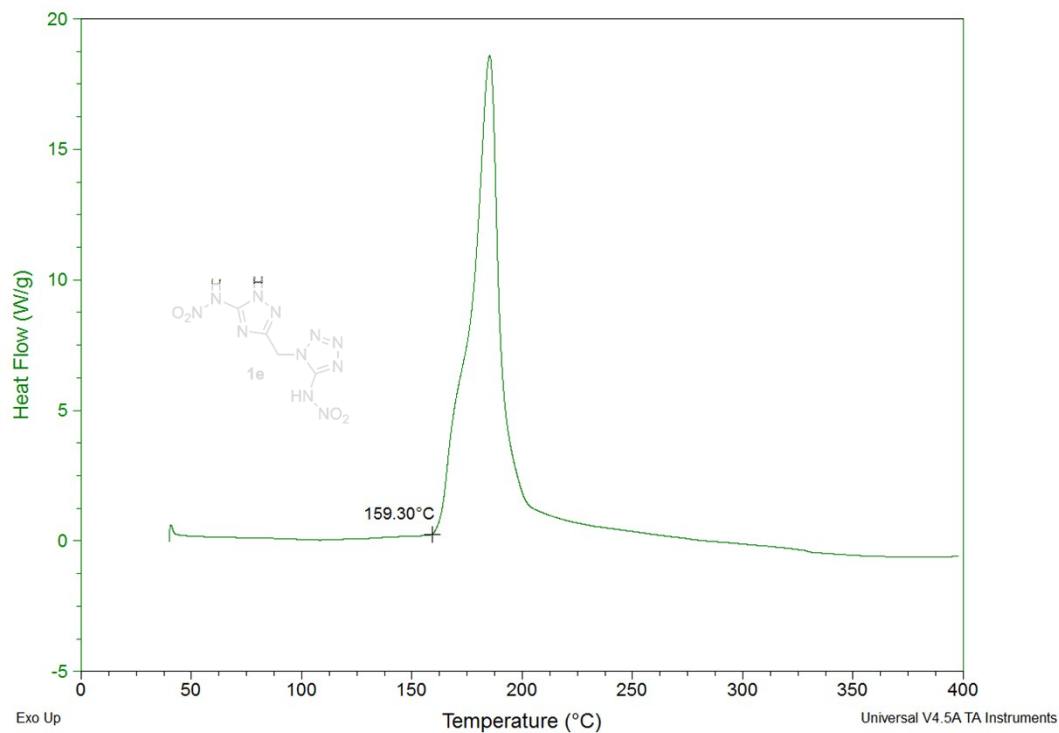

Sample: NH2T-2CH2-NHNO2Triz NH3OH  
Size: 0.9000 mg  
Method: Ramp

DSC

File: C:\...\NH2T-2CH2-NHNO2Triz NH3OH.001  
Operator: tyx  
Run Date: 19-Jan-2016 21:16  
Instrument: DSC Q20 V24.11 Build 124

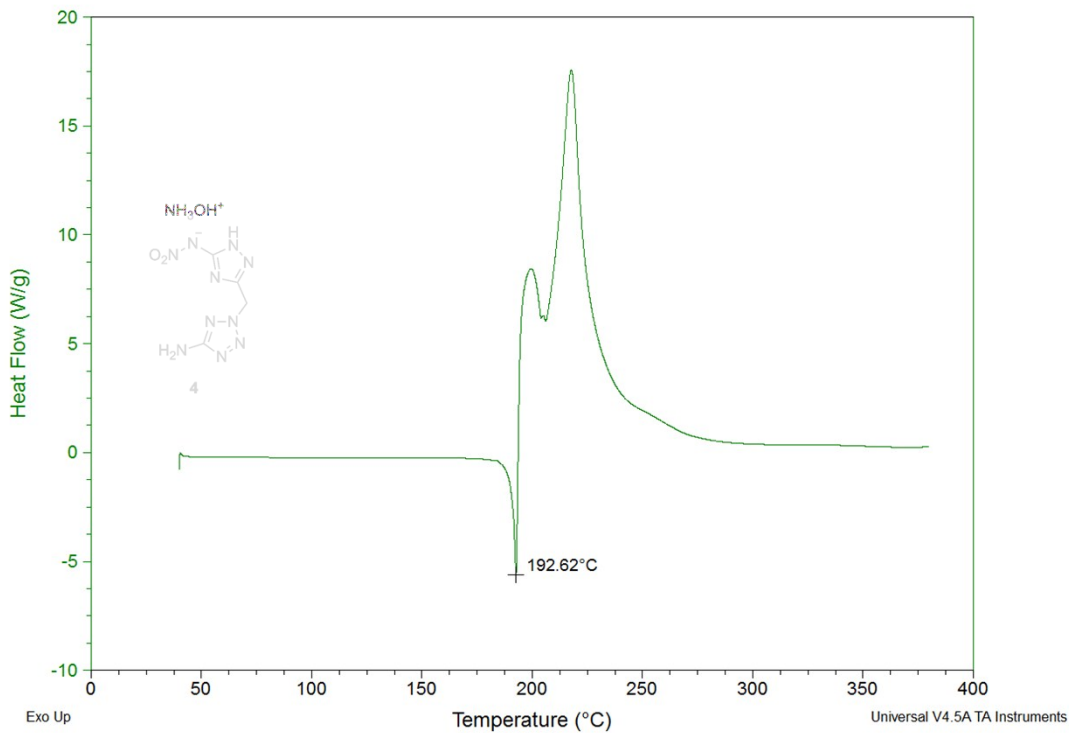

Sample: NH2T-1CH2-NHNO2Triz NH3OH  
Size: 1.4000 mg  
Method: Ramp

DSC

File: C:\...\NH2T-1CH2-NHNO2Triz NH3OH.001  
Operator: tyx  
Run Date: 19-Jan-2016 20:35  
Instrument: DSC Q20 V24.11 Build 124

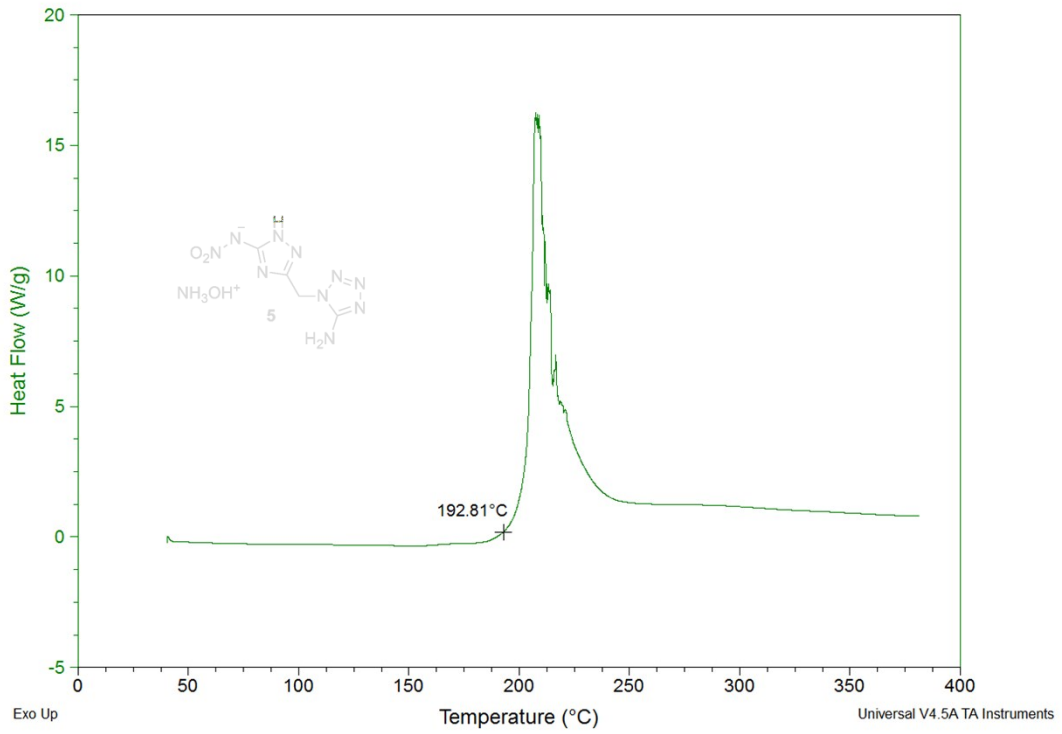

Sample: NHNO2T-1CH2-NHNO2Triz 2NH3OH-2  
Size: 1.0000 mg  
Method: Ramp

DSC

File: C:\...\NHNO2T-1CH2-NHNO2Triz 2NH3OH-2.f  
Operator: tyx  
Run Date: 25-Mar-2016 09:01  
Instrument: DSC Q20 V24.11 Build 124

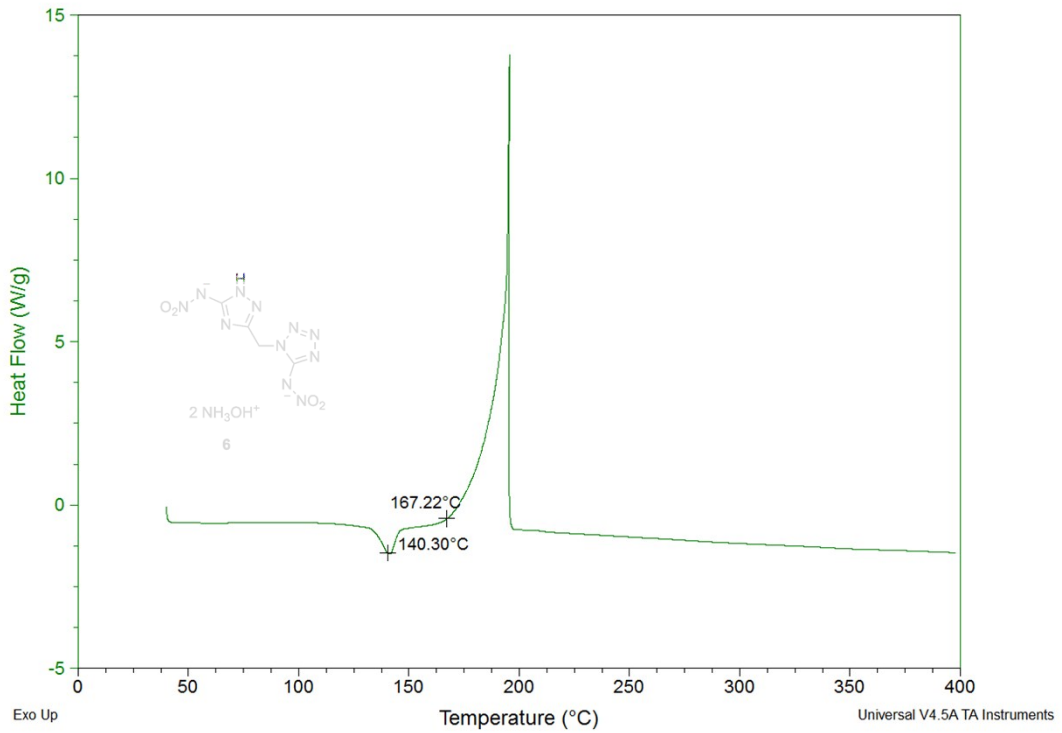

Sample: NHNO2T-1CH2-NHNO2Triz 2NH2h5+-5  
Size: 1.1000 mg  
Method: Ramp

DSC

File: ...NHNO2T-1CH2-NHNO2Triz 2NH2h5+-5.0C  
Operator: TYX  
Run Date: 13-Apr-2016 08:40  
Instrument: DSC Q20 V24.11 Build 124

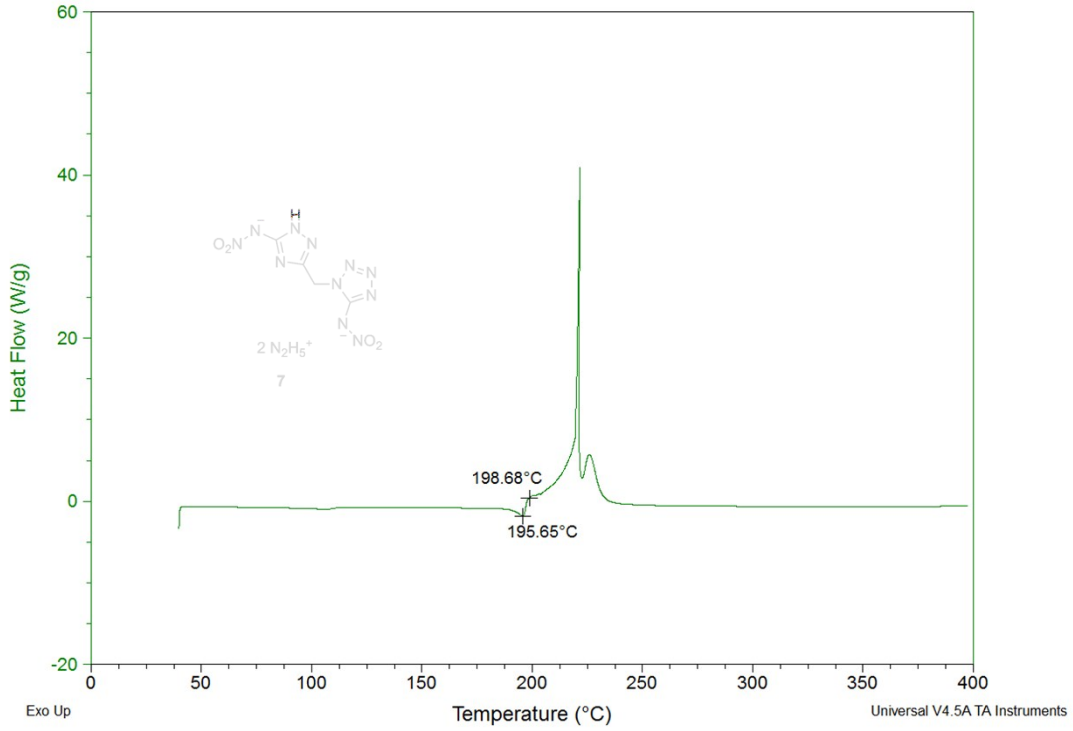

Sample: NHNO2T-1CH2-NHNO2Triz 2NH4-3  
Size: 0.7000 mg  
Method: Ramp

DSC

File: C:...NHNO2T-1CH2-NHNO2Triz 2NH4-3.001  
Operator: TYX  
Run Date: 13-Apr-2016 09:44  
Instrument: DSC Q20 V24.11 Build 124

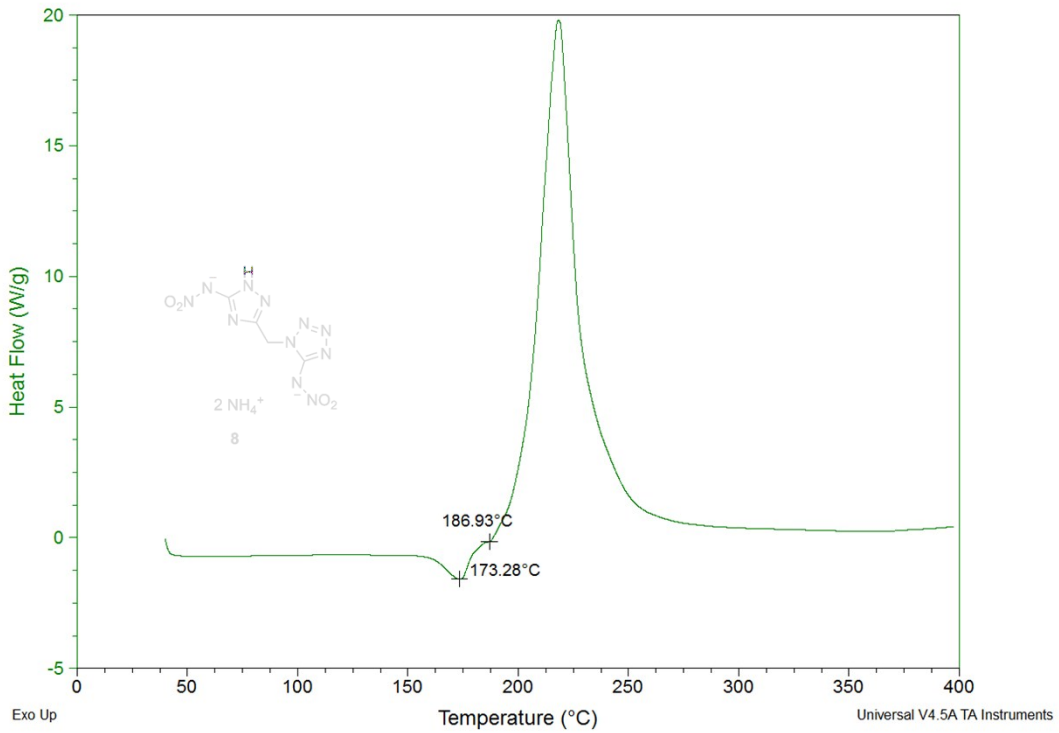

Supplement: c6ta05057c1.pdf [file c6ta05057c1.pdf]
